# Supplementary material
Source: HighWire-hosted journal article supplement (https://cmajopen.ca/highwire/filestream/80971/field_highwire_adjunct_files/0/open-2014-0079-1-at.pdf)
Supplement: open-2014-0079-1-at.pdf [file open-2014-0079-1-at.pdf]

**Appendix 1 (as supplied by the authors): Incidence rates of prostate cancer by age group, 1969-2007, Canada (logarithmic Y axis)**

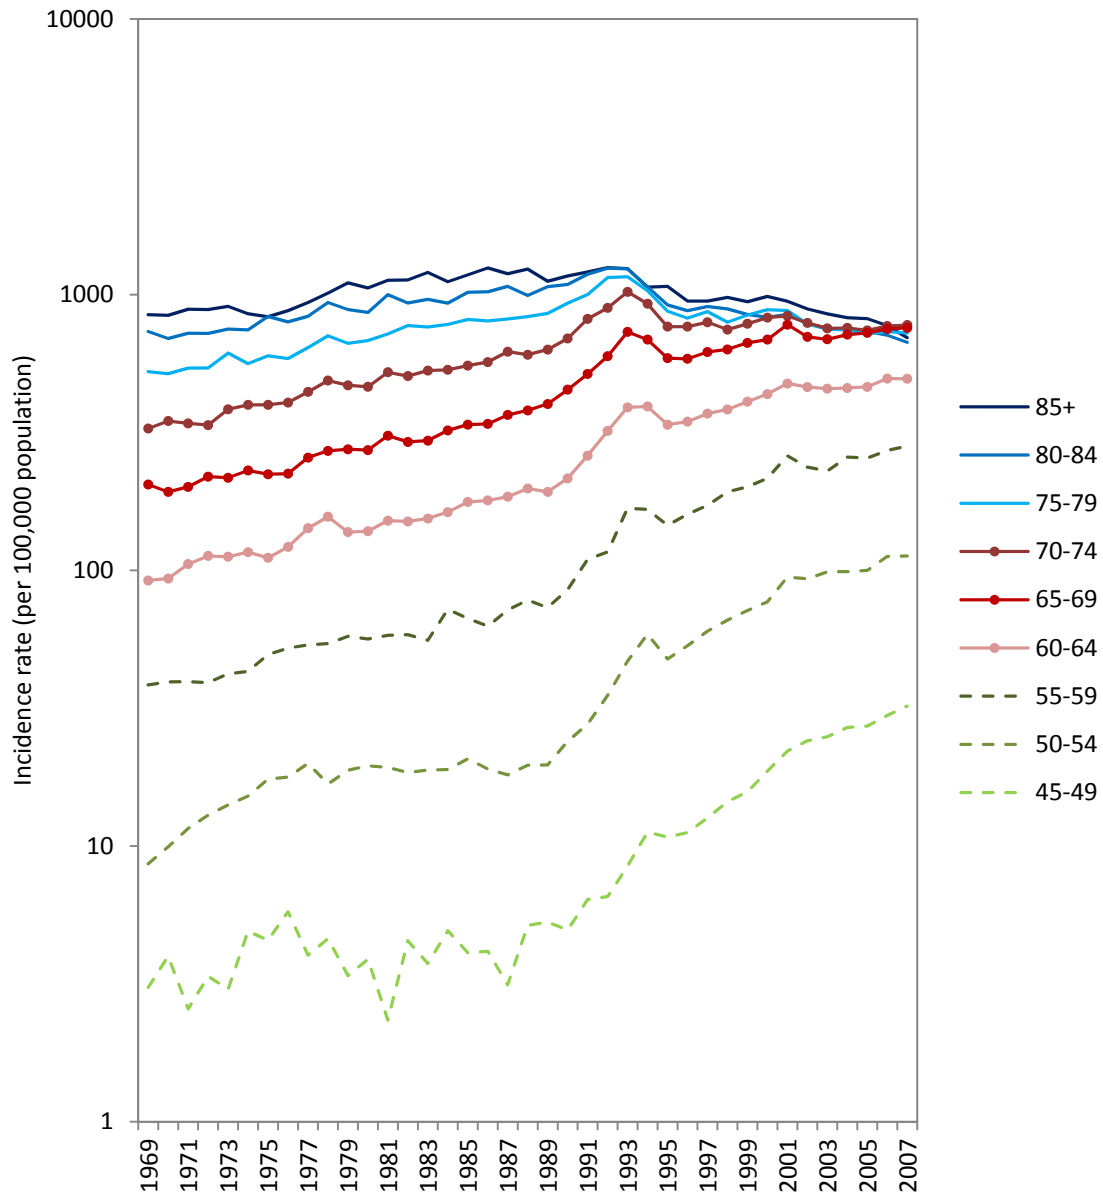

Appendix to: Dickinson J, Shane A, Tonelli M, et al. Trends in prostate cancer incidence and mortality in Canada during the era of prostate-specific antigen screening. *CMAJ Open* 2016. DOI:10.9778/cmajo.20140079.

Copyright © 2016 The Author(s) or their employer(s).

To receive this resource in an accessible format, please contact us at

cmajgroup@cmaj.ca.
